# Supplementary material
Source: Springer Nature journal article supplement (https://www.springermedizin.de/resource/supplementary/12986_2010_252_MOESM4_ESM.pdf/25655684)

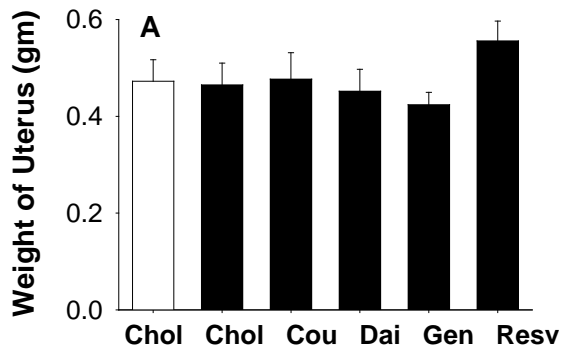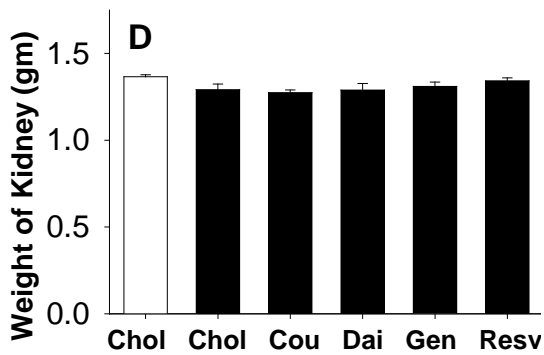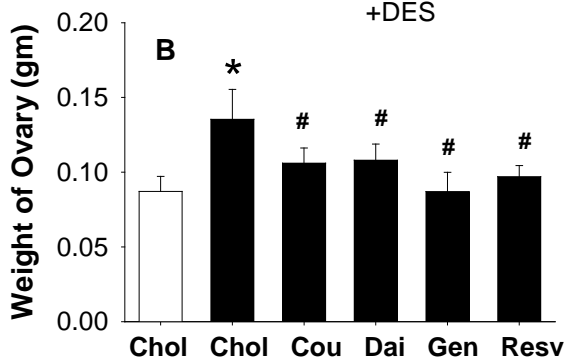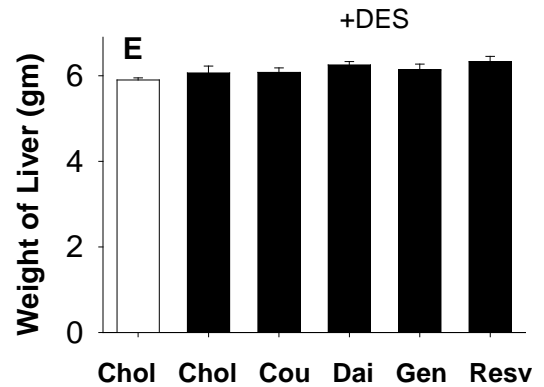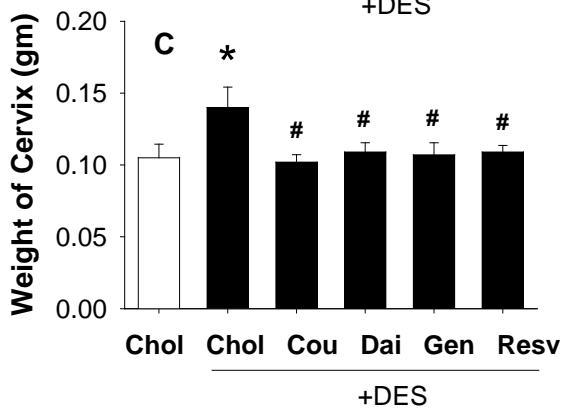

Supplement: MOESM4 [file 25655684]
